# Supplementary material
Source: MDPI journal article supplement (https://www.mdpi.com/2305-6320/8/2/9)

## Protein Report

LC-MALDI\_OtherMammals\_Mascot\_2020-01-17 11:09:35

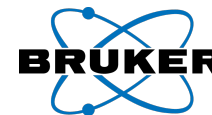

### Project Info

**Name:** 200115-hikeshi-wt **Date:** Jan 15, 2020

### Sample Info & Protocols

**Name:** 200116-Hikeshi-C4S  
**Date:** Jan 16, 2020

### Search Result Info

|                          |                                                          |                            |        |
|--------------------------|----------------------------------------------------------|----------------------------|--------|
| <b>Search Result:</b>    | LC-MALDI_OtherMammals_Mascot_2020-01-17 11:09:35         |                            |        |
| <b>Location:</b>         | /200115-hikeshi-wt/200116-Hikeshi-C4S/200116-Hikeshi-C4S |                            |        |
| <b>Search Method:</b>    | LC-MALDI_OtherMammals                                    | <b>Version:</b>            |        |
| <b>Search Engine(s):</b> | Mascot, 2.6.2                                            | <b>Ident. Compound(s):</b> | 5/1564 |
| <b>Database(s):</b>      | SwissProt, SwissProt_2019_07.fasta                       |                            |        |
| <b>Note:</b>             |                                                          |                            |        |

## Protein Report

LC-MALDI\_OtherMammals\_Mascot\_2020-01-17 11:09:35

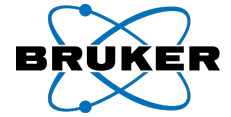

### Results

Protein 1: Filamin-A OS=Homo sapiens OX=9606 GN=FLNA PE=1 SV=4

|                |             |                    |      |
|----------------|-------------|--------------------|------|
| Accession:     | FLNA_HUMAN  | Score:             | 76.2 |
| Database:      | SwissProt   | Seq. Coverage [%]: | 0.9  |
| MW [kDa] / pI: | 280.6 / 5.7 | No. of Peptides:   | 2    |

## Protein Report

LC-MALDI\_OtherMammals\_Mascot\_2020-01-17 11:09:35

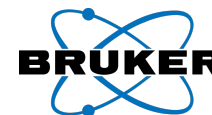

| 10         | 20         | 30         | 40         | 50         | 60         | 70         | 80         | 90         | 100        |
|------------|------------|------------|------------|------------|------------|------------|------------|------------|------------|
| MSSSHSRAGQ | SAAGAAPGGG | VDTRDAEMPA | TEKDLAEDAP | WKKIQQNTFT | RWCNEHLKCV | SKRIANLQTD | LSDGLRLIAL | LEVLSQKKMH | RKHNRPTFR  |
| 110        | 120        | 130        | 140        | 150        | 160        | 170        | 180        | 190        | 200        |
| QMQLNNSVA  | LEFLDRESIK | LVSIDSKAIV | DGNLKLILGL | IWTLILHYSI | SMPMWDEED  | EEAKKQTPKQ | RLLGWIQNKL | PQLPITNFSR | DWQSGRALGA |
| 210        | 220        | 230        | 240        | 250        | 260        | 270        | 280        | 290        | 300        |
| LVDSCAPGLC | PDWDSWDASK | PVTNAREAMQ | QADDWLGIPO | VITPEEIVDP | NVDEHSVMY  | LSQFPKAKLK | PGAPLRPKLN | PKKARAYGPG | IEPTGNMVKK |
| 310        | 320        | 330        | 340        | 350        | 360        | 370        | 380        | 390        | 400        |
| RAEFTVETRS | AGQGEVLVYV | EDPAGHQEEA | KVTANNDKNR | TFSVWYVPEV | TGTHKVTVLF | AGQHIKSPF  | EVYVDKSQGD | ASKVTAQGGP | LEPSGNIANK |
| 410        | 420        | 430        | 440        | 450        | 460        | 470        | 480        | 490        | 500        |
| TTYFEIFTAG | AGTGEVEVVI | QDPMGQKGT  | EPQLEARGDS | TYRCSYQPTM | EGVHTVHVTF | AGVPIRSPY  | TVTGVQACNP | SACRAVGRGL | QPKGVRVKET |
| 510        | 520        | 530        | 540        | 550        | 560        | 570        | 580        | 590        | 600        |
| ADFKVYTKGA | GSGELKVTVK | GPKGEERVQ  | KDLGDGVYGF | EYYPMVPGTY | IVTITWGGQN | IGRSPFEVKV | GTECGNQKVR | AWGPGLEGGV | VGKSADFVVE |
| 610        | 620        | 630        | 640        | 650        | 660        | 670        | 680        | 690        | 700        |
| AIGDDVGTLG | FSVEGPSQAK | IECDDKGDGS | CDVRYWPQEA | GEYAVHVLN  | SEDIRLSPFM | ADIRDAPQDF | HPDRVKARGP | GLEKTGVAVN | KPAEFTVDAK |
| 710        | 720        | 730        | 740        | 750        | 760        | 770        | 780        | 790        | 800        |
| HGGKAPLRVQ | VQDNEGCPVE | ALVKDNGNGT | YSCSYVPRKP | VKHTAMVSWG | GVSIPNSPFR | VNVGAGSHPN | KVKVYGPQVA | KTGLKAHEPT | YFTVDCAEAG |
| 810        | 820        | 830        | 840        | 850        | 860        | 870        | 880        | 890        | 900        |
| QGDVSIKIC  | APGVVGPAEA | DIDFDIIRND | NDTFTVKYTP | RGAGSYTIMV | LFADQATPTS | PIRVKVEPSH | DASKVKAEGP | GLSRTGVELG | KPTHFTVNAK |
| 910        | 920        | 930        | 940        | 950        | 960        | 970        | 980        | 990        | 1000       |
| AAGKGKLDVQ | FSGLTKGDAV | RDVDIIDHHD | NTYTVKYTPV | QQGPVGVNVT | YGGDPIPKSP | FSVAVSPSLD | LSKIKVSGLG | EKVDVGKDQE | FTVKSAGAGG |
| 1010       | 1020       | 1030       | 1040       | 1050       | 1060       | 1070       | 1080       | 1090       | 1100       |
| QGKVASKIVG | PSGAAPVCKV | EPGLGADNSV | VRFLPREEGP | YEVEVTYDGV | PVPGSPFPLE | AVAPTQPSKV | KAFGPGLQGG | SAGSPARFTI | DTKGAGTGGL |
| 1110       | 1120       | 1130       | 1140       | 1150       | 1160       | 1170       | 1180       | 1190       | 1200       |
| GLTVEGPCEA | QLECLDNGDG | TCSVSYVPT  | PGDYNINILF | ADTHIPGSPF | KAHVVPFCDA | SKVKCSGPG  | ERATAGEVGQ | FQVDCSSAGS | AELTIEICSE |
| 1210       | 1220       | 1230       | 1240       | 1250       | 1260       | 1270       | 1280       | 1290       | 1300       |
| AGLPAEVIYQ | DHGDGTHIT  | YIPLCPGAYT | VTIKYGGQPV | PNFPSKLQVE | PAVDTSQVQC | YGPQIEGQGV | FREATTEFSV | DARALQTQGG | PHVKARVANP |

## Protein Report

LC-MALDI\_OtherMammals\_Mascot\_2020-01-17 11:09:35



### MS/MS Peptide Matches

| Cmpd. | m/z meas. | z | $\Delta$ m/z [ppm] | $\Delta$ m/z [Da] | Rt [min] | Score | No. of Cmpds. | Site [%] | P | Sequence          | Modification | Range     | Type |
|-------|-----------|---|--------------------|-------------------|----------|-------|---------------|----------|---|-------------------|--------------|-----------|------|
| 1090  | 1226.6485 | 1 | -3.50              | -0.0043           | 37.83    | 45.91 | 1             | 0.0      | 0 | R.AWGPGLEGGVVGK.S |              | 581-593   | CID  |
| 267   | 1108.6142 | 1 | 2.95               | 0.0033            | 25.17    | 30.3  | 1             | 0.0      | 0 | R.ALTQTGGPHVK.A   |              | 1284-1294 | CID  |

### Protein 2: RNA-binding protein 10 OS=Homo sapiens OX=9606 GN=RBM10 PE=1 SV=3

**Accession:** RBM10\_HUMAN  
**Database:** SwissProt  
**MW [kDa] / pI:** 103.5 / 5.7

**Score:** 69.7  
**Seq. Coverage [%]:** 1.6  
**No. of Peptides:** 1

## Protein Report

LC-MALDI\_OtherMammals\_Mascot\_2020-01-17 11:09:35



|            |             |            |            |             |            |            |             |             |            |
|------------|-------------|------------|------------|-------------|------------|------------|-------------|-------------|------------|
| 10         | 20          | 30         | 40         | 50          | 60         | 70         | 80          | 90          | 100        |
| MEYERRGGRG | DRTGRYGATD  | RSQDDGGENR | SRDHDYRDMD | YRSYPREYGS  | QEGKHDYDDS | SEEQSAEDSY | EASPGSETQR  | RRRRRRHRHSP | TGPPGFPRDG |
| 110        | 120         | 130        | 140        | 150         | 160        | 170        | 180         | 190         | 200        |
| DYRDQDYRTE | QGEHEEEEEED | EEEEKASNI  | VMLRMLPQAA | TEDDIRGQLQ  | SHGVQAREVR | LMRNKSSGQS | RGFAFVEFSH  | LQDATRWMEA  | NQHSNLNLGQ |
| 210        | 220         | 230        | 240        | 250         | 260        | 270        | 280         | 290         | 300        |
| KVSMHYSDPK | PKINEDWLCN  | KCGVQNFKRR | EKCFKCGVPK | SEAEQKLPLG  | TRLDQQTLPL | GGRELSQGLL | PLPQPYQAQG  | VLASQALSQG  | SEPSSENAND |
| 310        | 320         | 330        | 340        | 350         | 360        | 370        | 380         | 390         | 400        |
| TIILRNLNPH | STMSILGAL   | APYAVLSSSN | VRVIKDKQTQ | LNRGFAFIQL  | STIVEAAQLL | QILQALHPPL | TIDGKTINVE  | FAKGSKRDMA  | SNEGSRISAA |
| 410        | 420         | 430        | 440        | 450         | 460        | 470        | 480         | 490         | 500        |
| SVASTAIAAA | QWASQASQG   | GEGTWATSEE | PPVDYSYYQQ | DEGYGNSQGT  | ESSLYAHGYL | KGTKGPGITG | TKGDPTGAGP  | EASLEPGADS  | VSMQAFSRAQ |
| 510        | 520         | 530        | 540        | 550         | 560        | 570        | 580         | 590         | 600        |
| PGAAPGIYQQ | SAEASSSQGT  | AANSQSYTIM | SPAVLKSELQ | SPTHSSALP   | PATSPTAQES | YSQYPVPDVS | TYQYDETSYG  | YYDPQTGLYY  | DPNSQYYNA  |
| 610        | 620         | 630        | 640        | 650         | 660        | 670        | 680         | 690         | 700        |
| QSQQYLYWDG | ERRTYVPALE  | QSADGHKETG | APSKEGKEKK | EKHKTAKTAQQ | IAKDMERWAR | SLNKQKENFK | NSFQPISSLR  | DDERRESATA  | DAGYATLEKK |
| 710        | 720         | 730        | 740        | 750         | 760        | 770        | 780         | 790         | 800        |
| GALAERQHTS | MDLPKLASDD  | RPSPPRGLVA | AYSGESDSEE | EQERGGPERE  | EKLTDWQKLA | CLLCRRQFPS | KEALIRHQQL  | SGLHKQNLEI  | HRRRAHSENE |
| 810        | 820         | 830        | 840        | 850         | 860        | 870        | 880         | 890         | 900        |
| LEALEKNDME | QMKYRDRAAE  | RREKYGIPEP | PEPKRRKYGG | ISTASVDFEQ  | PTRDGLGSDN | IGSRMLQAMG | WKEGSGGLGRK | KQGIVTPIEA  | QTRVRGSGLG |
| 910        | 920         | 930        | 940        |             |            |            |             |             |            |
| ARGSSYGVT  | TESYKETLHK  | TMVTRFNEAQ |            |             |            |            |             |             |            |

## MS/MS Peptide Matches

| Cmpd. | m/z meas. | z | $\Delta$ m/z [ppm] | $\Delta$ m/z [Da] | Rt [min] | Score | No. of Cmpds. | Site [%] | P | Sequence             | Modification | Range   | Type |
|-------|-----------|---|--------------------|-------------------|----------|-------|---------------|----------|---|----------------------|--------------|---------|------|
| 1299  | 1620.7583 | 1 | -24.80             | -0.0402           | 39.83    | 69.72 | 1             | 0.0      | 1 | R.MLQAMGWKEGSGGLGR.K |              | 865-879 | CID  |

# Protein Report

LC-MALDI\_OtherMammals\_Mascot\_2020-01-17 11:09:35

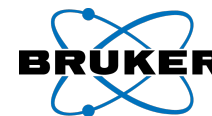

## Protein 3: Protein phosphatase 1B OS=Homo sapiens OX=9606 GN=PPM1B PE=1 SV=1

Accession: PPM1B\_HUMAN Score: 37.9  
Database: SwissProt Seq. Coverage [%]: 1.9  
MW [kDa] / pI: 52.6 / 5.0 No. of Peptides: 1

|             |            |            |            |            |            |            |             |            |            |
|-------------|------------|------------|------------|------------|------------|------------|-------------|------------|------------|
| 10          | 20         | 30         | 40         | 50         | 60         | 70         | 80          | 90         | 100        |
| MGAFLDKPKT  | EKHNAHGAGN | GLRYGLSSMQ | GWRVEMEDAH | TAVVGIPHGL | EDWSFFAVYD | GHAGSRVANY | CSTHLLLEHIT | TNEDFRAAGK | SGSALELSVE |
| 110         | 120        | 130        | 140        | 150        | 160        | 170        | 180         | 190        | 200        |
| NVKNIGIRTGF | LKIDEYMRNF | SDLRNGMDRS | GSTAVGVMIS | PKHIYFINGC | DSRAVLYRNG | QVCFSTQDHK | PCNPREKERI  | QNAGGSVMIQ | RVNGSLAVSR |
| 210         | 220        | 230        | 240        | 250        | 260        | 270        | 280         | 290        | 300        |
| ALGDYDYKCV  | DGKGPTQLV  | SPEPEVYEIL | RAEDEFIIL  | ACDGIWDVMS | NEELCEYVKS | RLEVSDDLN  | VCNWVDTCL   | HKGSRDNMSI | VLVCFSNAPK |
| 310         | 320        | 330        | 340        | 350        | 360        | 370        | 380         | 390        | 400        |
| VSDEAVKDS   | ELDKHLESRV | EEIMEKSGEE | GMPDLAHVMR | ILSAENIPNL | PPGGGLAGKR | NVIEAVYSRL | NPHRESDGAS  | DEAEESGSQG | KLVEALRQMR |
| 410         | 420        | 430        | 440        | 450        | 460        | 470        | 480         |            |            |
| INHRGNRYQL  | LEEMLTSYRL | AKVEGEESPA | EPAATATSSN | SDAGNPVTMQ | ESHTESEGL  | AELDSSNEDA | GTRKMSGEKI  |            |            |

### MS/MS Peptide Matches

| Cmpd. | m/z meas. | z | $\Delta$ m/z [ppm] | $\Delta$ m/z [Da] | Rt [min] | Score | No. of Cmpds. | Site [%] | P | Sequence      | Modification | Range   | Type |
|-------|-----------|---|--------------------|-------------------|----------|-------|---------------|----------|---|---------------|--------------|---------|------|
| 1012  | 1050.5371 | 1 | -19.74             | -0.0207           | 35.83    | 37.87 | 1             | 0.0      | 0 | R.NVIEAVYSR.L |              | 361-369 | CID  |

## Protein 4: Probable tRNA (uracil-O(2)-)-methyltransferase OS=Homo sapiens OX=9606 GN=TRMT44 PE=1 SV=2

Accession: TRM44\_HUMAN Score: 32.9  
Database: SwissProt Seq. Coverage [%]: 1.1  
MW [kDa] / pI: 84.6 / 7.0 No. of Peptides: 1

## Protein Report

LC-MALDI\_OtherMammals\_Mascot\_2020-01-17 11:09:35



|            |                         |                         |            |            |            |            |             |            |            |
|------------|-------------------------|-------------------------|------------|------------|------------|------------|-------------|------------|------------|
| 10         | 20                      | 30                      | 40         | 50         | 60         | 70         | 80          | 90         | 100        |
| MAEVGRTGIS | YPGALLPQGF              | WAAVEVWLER              | PQVANKRLCG | ARLEARWSAA | LPCAEARGPG | TSAGSEQKER | GPGPGQGSPG  | GGPGPRSLSG | PEQGTACCEL |
| 110        | 120                     | 130                     | 140        | 150        | 160        | 170        | 180         | 190        | 200        |
| EEAQGGCQQE | EAQREAA <sup>SV</sup> P | LRDSGHPGHA              | EGREGDFPAA | DLDLWEDFS  | QSLARGNSEL | LAFLTSSGAG | SQPEAQRELD  | VVLRTVIPKT | SPHCPLTTPR |
| 210        | 220                     | 230                     | 240        | 250        | 260        | 270        | 280         | 290        | 300        |
| REIVVQDVLN | GTITFLPLEE              | DDEGNLKVVM              | SNVYQIQLSH | SKEEWFISVL | IFCPERWHS  | GIVYPKPTWL | GEELLAKLAK  | WSVENKKSDF | KSTLSLISIM |
| 310        | 320                     | 330                     | 340        | 350        | 360        | 370        | 380         | 390        | 400        |
| KYSKAYQELK | EKYKEMVKVW              | PEVTDPEKFF              | YEDVAIAAYL | LILWEEERAE | RRLTARQSFV | DLGCGNGLLV | HILSSEGHPG  | RGIDVRRRKI | WDMYGPQTQL |
| 410        | 420                     | 430                     | 440        | 450        | 460        | 470        | 480         | 490        | 500        |
| EEDAITPNDK | TLFPDWDWLI              | GNHSD <sup>EL</sup> TPW | IPVIAARSSY | NCRFFVLPC  | FFDFIGRYSR | RQSKKTQYRE | YLDIFIKEVGF | TCGFHVDEDC | LRIPSTKRVC |
| 510        | 520                     | 530                     | 540        | 550        | 560        | 570        | 580         | 590        | 600        |
| LVGKSRTYPS | SREASVDEKR              | TQYIKSRRGC              | PVSPPGWELS | PSPRWVAAGS | AGHCDGQAL  | DARVGCVTRA | WAAEHGAGPQ  | AEGPWLPGFH | PREKAERVRN |
| 610        | 620                     | 630                     | 640        | 650        | 660        | 670        | 680         | 690        | 700        |
| CAALPRDFID | QVVLQVANLL              | LGGKQLNTRS              | SRNGSLKTWN | GGESLSLAEV | ANELDTETLR | RLKRECGGLQ | TLLRNSHQVF  | QVVNGRVHIR | DWREETLWKT |
| 710        | 720                     | 730                     | 740        | 750        | 760        |            |             |            |            |
| KQPEAKQRL  | SEACKTRLCW              | FFMHHPDGCA              | LSTDCCPFAH | GPAELRPPT  | TPRKIS     |            |             |            |            |

## MS/MS Peptide Matches

| Cmpd. | m/z meas. | z | $\Delta$ m/z [ppm] | $\Delta$ m/z [Da] | Rt [min] | Score | No. of Cmpds. | Site [%] | P | Sequence     | Modification | Range   | Type |
|-------|-----------|---|--------------------|-------------------|----------|-------|---------------|----------|---|--------------|--------------|---------|------|
| 673   | 842.4784  | 1 | 6.36               | 0.0054            | 31.67    | 32.87 | 1             | 0.0      | 0 | R.EAASVPLR.D |              | 115-122 | CID  |

Protein 5: Centrosome-associated protein 350 OS=Homo sapiens OX=9606 GN=CEP350 PE=1 SV=1

Accession: CE350\_HUMAN  
 Database: SwissProt  
 MW [kDa] / pI: 350.7 / 6.0  
 Modification(s): Phospho

Score: 32.2  
 Seq. Coverage [%]: 0.0  
 No. of Peptides: 0



## Protein Report

LC-MALDI\_OtherMammals\_Mascot\_2020-01-17 11:09:35

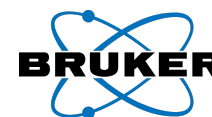

| 10         | 20         | 30         | 40         | 50         | 60         | 70         | 80         | 90         | 100         |
|------------|------------|------------|------------|------------|------------|------------|------------|------------|-------------|
| MRSSKSKEVP | LPNPRNSQSK | DTVQADITTS | WDALSQTKAA | LRHIENKLEV | APTSTAVCDS | VMDTKKSSTS | ATRKISRKDG | RYLDDSWVNA | PISKSTKSRK  |
| 110        | 120        | 130        | 140        | 150        | 160        | 170        | 180        | 190        | 200         |
| EKSRSPLRAT | TLESNVKKN  | RVEFREPLVS | YREIHGAPSN | FSSSHLESKH | VYCVDVNEEK | TESGNWMIGS | REERNIRSCD | FESSQSSVIN | DTVVRFLNDR  |
| 210        | 220        | 230        | 240        | 250        | 260        | 270        | 280        | 290        | 300         |
| PAIDALQNSE | CLIRMGASMR | TEEEMP     | NRTK       | GSENNLKLSV | NNMAHDTDPK | ALRLTDSSPS | STSTSNSQRL | DILKRRQHDV | KLEKLKERIR  |
| 310        | 320        | 330        | 340        | 350        | 360        | 370        | 380        | 390        | 400         |
| GRGQKLGHID | HPVMVNVNDN | SVTAKVRKVA | TAPPAPAYKG | FNPSETKIRT | PDGKVVQAE  | FQMSRELYR  | DLALHFADDI | SIKEKPAEKS | KEKKVVKPVR  |
| 410        | 420        | 430        | 440        | 450        | 460        | 470        | 480        | 490        | 500         |
| KVQKVAQLSS | TECRTGSSHL | ISTSSWRDQ  | KLVKILGPA  | PRMEPKEQRT | ASSDRGGRER | TAKSGGHIGR | AESDPRLDVL | HRHLQNSER  | SRSKSRSENN  |
| 510        | 520        | 530        | 540        | 550        | 560        | 570        | 580        | 590        | 600         |
| IKKLASSLPD | NKQEENTALN | KDFLPIEIRG | ILDDLQLDST | AHTAKQDTVE | LQNQKSSAPV | HAPRSHSPVK | RKPKKITANE | DPPVISKRRH | YDTDEVQRQYI |
| 610        | 620        | 630        | 640        | 650        | 660        | 670        | 680        | 690        | 700         |
| VRQQEERKRK | QNEEKKAQKE | ATEQKNRLQ  | ELYRKQKEAF | TKVKVPPSE  | PSATRLQET  | YSKLLLEKTL | LEEPSHQHVT | QETQAKPGYQ | PSGESDKENK  |
| 710        | 720        | 730        | 740        | 750        | 760        | 770        | 780        | 790        | 800         |
| VQERPPSASS | SSDMSLSEPP | QPLARKDLME | STWMQPERLS | PQVHHSQPQP | FAGTAGSLLS | HLLSLEHVGI | LHKDFESILP | TRKNHNMASR | PLTFTPQPYV  |
| 810        | 820        | 830        | 840        | 850        | 860        | 870        | 880        | 890        | 900         |
| TSPAAYTDAL | LKPSASQYKS | KLDRIEALKA | TAASLSSRIE | SEAKKLAGAS | INYGSAWNTE | YDVQQAPQED | GPWTKAVTPP | VKDDNEDVFS | ARIQKMLGSC  |
| 910        | 920        | 930        | 940        | 950        | 960        | 970        | 980        | 990        | 1000        |
| VSHATFDDDL | PGVG       | NLSEFK     | KLPEMIRPQS | AISSFRVRSP | GPKPEGLLAQ | LCKRQTDSSS | SDMQACSQDK | AKISLGSSID | SVSEGPLLSE  |
| 1010       | 1020       | 1030       | 1040       | 1050       | 1060       | 1070       | 1080       | 1090       | 1100        |
| DGQPLLKVAE | ILKEKEFCPG | ERNSEPIKE  | FQKEAEKFLP | LFGHIGGTQS | KGPWEELAKG | SPHSVINIFT | KSYQLYGKGF | EDKLDRGTST | SRPL        |
| 1110       | 1120       | 1130       | 1140       | 1150       | 1160       | 1170       | 1180       | 1190       | 1200        |
| LSGVSYEDDF | VSSPGTGTST | EKKSTLEPHS | TLSPQEDHSN | RKSAYDPSSV | DVTSQHSSGA | QSAASSRSST | SSKGKKGKKE | KTEWLDSTFG | NVQNSLLDEE  |
| 1210       | 1220       | 1230       | 1240       | 1250       | 1260       | 1270       | 1280       | 1290       | 1300        |
| KAERGSHQGK | KSGTSSKLSV | KDFEQTLDTD | STLEDLSGHS | VSVSSDKGRS | QKTPTSPLSP | SSQKSLQFDV | AGTSSERSKS | SVMPTITGF  | KPNAPLTDLN  |



Protein Report

LC-MALDI\_OtherMammals\_Mascot\_2020-01-17 11:09:35

---

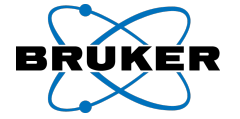

Supplement: s1 [file s1]
