# Supplementary material
Source: MDPI journal article supplement (https://www.mdpi.com/2305-6320/8/2/9)
Supplement: s1 [file s1]

## Protein Report

LC-MALDI\_OtherMammals\_Mascot\_2020-01-15 19:00:42

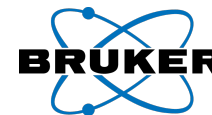

### Project Info

**Name:** 200115-hikeshi-wt **Date:** Jan 15, 2020

### Sample Info & Protocols

**Name:** 200115-hikeshi-wt  
**Date:** Jan 15, 2020

### Search Result Info

|                          |                                                        |                                  |
|--------------------------|--------------------------------------------------------|----------------------------------|
| <b>Search Result:</b>    | LC-MALDI_OtherMammals_Mascot_2020-01-15 19:00:42       |                                  |
| <b>Location:</b>         | /200115-hikeshi-wt/200115-hikeshi-wt/200115-hikeshi-wt |                                  |
| <b>Search Method:</b>    | LC-MALDI_OtherMammals                                  | <b>Version:</b>                  |
| <b>Search Engine(s):</b> | Mascot, 2.6.2                                          | <b>Ident. Compound(s):</b> 6/300 |
| <b>Database(s):</b>      | SwissProt, SwissProt_2019_07.fasta                     |                                  |
| <b>Note:</b>             |                                                        |                                  |

## Protein Report

LC-MALDI\_OtherMammals\_Mascot\_2020-01-15 19:00:42

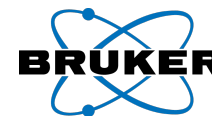

### Results

#### Protein 1: Protein Hikeshi OS=Homo sapiens OX=9606 GN=HIKESHI PE=1 SV=2

Accession: HIKES\_HUMAN Score: 207.4  
Database: SwissProt Seq. Coverage [%]: 16.2  
MW [kDa] / pI: 21.6 / 5.3 No. of Peptides: 3

|            |            |            |            |            |            |            |            |            |            |
|------------|------------|------------|------------|------------|------------|------------|------------|------------|------------|
| 10         | 20         | 30         | 40         | 50         | 60         | 70         | 80         | 90         | 100        |
| MFGCLVAGRL | VQTAAQQVAE | DKFVFDLPDY | ESINHVVVFM | LGTIPFPEGM | GGSVYFSYPD | SNGMPVWQLL | GFVTNGKPSA | IFKISGLKSG | EGSQHPFGAM |
| 110        | 120        | 130        | 140        | 150        | 160        | 170        | 180        | 190        | 200        |
| NIVRTPSVAQ | IGISVELLDS | MAQQTPVGNA | AVSSVDSFTQ | FTQKMLDNFY | NFASSFAVSQ | AQMTSPSEM  | FIPANVVLKW | YENFQRRLAQ | NPLFWKT    |

#### MS/MS Peptide Matches

| Cmpd. | m/z meas. | z | $\Delta$ m/z [ppm] | $\Delta$ m/z [Da] | Rt [min] | Score | No. of Cmpds. | Site [%] | P | Sequence             | Modification | Range   | Type |
|-------|-----------|---|--------------------|-------------------|----------|-------|---------------|----------|---|----------------------|--------------|---------|------|
| 158   | 1686.7879 | 1 | -8.16              | -0.0138           | 38.17    | 92.92 | 1             | 0.0      | 0 | K.SGEGSQHPFGAMNIVR.T |              | 89-104  | CID  |
| 112   | 1042.4743 | 1 | 0.19               | 0.0002            | 34.67    | 51.29 | 1             | 0.0      | 0 | K.WYENFQR.R          |              | 180-186 | CID  |
| 218   | 1116.6077 | 1 | -11.05             | -0.0123           | 43.17    | 63.21 | 1             | 0.0      | 0 | R.LAQNPLFWK.T        |              | 188-196 | CID  |

#### Protein 2: Fermitin family homolog 1 OS=Homo sapiens OX=9606 GN=FERMT1 PE=1 SV=1

Accession: FERM1\_HUMAN Score: 31.5  
Database: SwissProt Seq. Coverage [%]: 1.9  
MW [kDa] / pI: 77.4 / 5.9 No. of Peptides: 1

## Protein Report

LC-MALDI\_OtherMammals\_Mascot\_2020-01-15 19:00:42

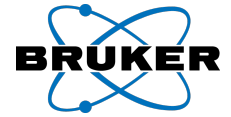

|            |            |             |            |            |            |            |            |            |            |
|------------|------------|-------------|------------|------------|------------|------------|------------|------------|------------|
| 10         | 20         | 30          | 40         | 50         | 60         | 70         | 80         | 90         | 100        |
| MLSSTDFTF  | SWELVVRVDH | PNEEQQKQDVT | LRVSGDLHVG | GVMLKLVEQI | NISQDWSDF  | LWWEQKHCWL | LKTHWTLDKY | GVQADAKLLF | TPQHMLRLR  |
| 110        | 120        | 130         | 140        | 150        | 160        | 170        | 180        | 190        | 200        |
| LPNLKQVRLR | VSFSAVVFKA | VSDICKILNI  | RRSEELSLK  | PSGDYFKKKK | KKDKNNKEPI | IEDILNLESS | PTASGSSVSP | GLYSKTMTP  | YDPINGTPAS |
| 210        | 220        | 230         | 240        | 250        | 260        | 270        | 280        | 290        | 300        |
| STMTWFSDSP | LTEQNCILA  | FSQPPQSPEA  | LADMYQPRSL | VDKAKLNAGW | LDSSRSIMEQ | GIQEDQLLL  | RFKYYSFFDL | NPKYDAVRIN | QLYEQARWAI |
| 310        | 320        | 330         | 340        | 350        | 360        | 370        | 380        | 390        | 400        |
| LLEEIDCTEE | EMLIFAALQY | HISKLSLSAE  | TQDFAGESEV | DEIEAALSNL | EVTLEGGKAD | SLLEDITDIP | KLADNLKLF  | PKLLPKAFK  | QYWFIFKDT  |
| 410        | 420        | 430         | 440        | 450        | 460        | 470        | 480        | 490        | 500        |
| IAYFKNKELE | QGEPEKLNL  | RGCEVVPDVN  | VAGRKFGLK  | LIPVADGMNE | MYLRCDHENQ | YAQWMAACML | ASKGKTADS  | SYQPEVLN   | SFLRMKRN   |
| 510        | 520        | 530         | 540        | 550        | 560        | 570        | 580        | 590        | 600        |
| ASQVASSLEN | MDMNPECFVS | PRCAKRHKSK  | QLAARILEAH | QNVAQMPLE  | AKLRFIQAWQ | SLPEFGLTY  | LVRFKGSKD  | DILGVSYNRL | IKIDAATGIP |
| 610        | 620        | 630         | 640        | 650        | 660        | 670        | 680        |            |            |
| VTTWRFTNIK | QWNVNWETRQ | VVIEFDQNVF  | TAFTCLSADC | KIVHEYIGGY | IFLSTRSKDQ | NETLDEDLFH | KLTGGQD    |            |            |

## MS/MS Peptide Matches

| Cmpd. | m/z meas. | z | $\Delta$ m/z [ppm] | $\Delta$ m/z [Da] | Rt [min] | Score | No. of Cmpds. | Site [%] | P | Sequence          | Modification | Range   | Type |
|-------|-----------|---|--------------------|-------------------|----------|-------|---------------|----------|---|-------------------|--------------|---------|------|
| 50    | 1400.7292 | 1 | -17.16             | -0.0240           | 28.83    | 31.48 | 1             | 0.0      | 0 | K.IDAATGIPVTTWR.F |              | 593-605 | CID  |

## Protein 3: Ribosome-binding protein 1 OS=Homo sapiens OX=9606 GN=RRBP1 PE=1 SV=5

Accession: RRBP1\_HUMAN  
 Database: SwissProt  
 MW [kDa] / pI: 152.4 / 8.7

Score: 27.3  
 Seq. Coverage [%]: 0.7  
 No. of Peptides: 1

## Protein Report

LC-MALDI\_OtherMammals\_Mascot\_2020-01-15 19:00:42

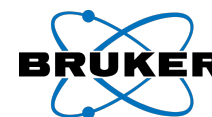

|            |             |            |            |            |            |            |            |            |            |
|------------|-------------|------------|------------|------------|------------|------------|------------|------------|------------|
| 10         | 20          | 30         | 40         | 50         | 60         | 70         | 80         | 90         | 100        |
| MDIYDTQTLG | VVVFGGFMV   | SAIGIFLVST | FSMKETSYEE | ALANQRKEMA | KTHHQKVEKK | KKEKTVEKKG | KTKKKKEEKN | GKIPDHPAP  | NVTVLLREPV |
| 110        | 120         | 130        | 140        | 150        | 160        | 170        | 180        | 190        | 200        |
| RAPAVAVAPT | PVQPPPIIVAP | VATVPAMPQE | KLASSPKDKK | KKEKKVAKVE | PAVSSVVNSI | QVLTSKAAIL | ETAPKEVPMV | VVPPVGAIGN | TPATGTTQGK |
| 210        | 220         | 230        | 240        | 250        | 260        | 270        | 280        | 290        | 300        |
| KAEGTQNSK  | KAEGAPNQGR  | KAEGTPNQGK | KTEGTPNQGK | KAEGTPNQGK | KAEGTPNQGK | KAEGAQNQGK | KVDTPNQGK  | KVEGAPTQGR | KAEGAQNQAK |
| 310        | 320         | 330        | 340        | 350        | 360        | 370        | 380        | 390        | 400        |
| KVEGAQNQGK | KAEGAQNQGK  | KGEGAQNQGK | KAEGAQNQGK | KAEGAQNQGK | KAEGAQNQGK | KAEGAQNQGK | KAEGAQNQGK | KAEGAQNQGK | KVEGAQNQGK |
| 410        | 420         | 430        | 440        | 450        | 460        | 470        | 480        | 490        | 500        |
| KAEGAQNQGK | KAEGAQNQGK  | KAEGAQNQGK | KAEGAQNQGK | KAEGAQNQGK | KAEGAQNQGK | KAEGAQNQGK | KVEGAQNQGK | KAEGAQNQGK | KAEGAQNQGK |
| 510        | 520         | 530        | 540        | 550        | 560        | 570        | 580        | 590        | 600        |
| KAEGAQNQGG | KGEGAQNQGK  | KTEGAQGGKA | ERSPNQGGKG | EGAPIQGGKA | DSVANQGTKV | EGITNQGGKA | EGSPSEGKKA | EGSPNQGGKA | DAAANQGGKT |
| 610        | 620         | 630        | 640        | 650        | 660        | 670        | 680        | 690        | 700        |
| ESASVQGRNT | DVAQSPEAPK  | QEAPAKKSG  | SKKKGEPGPP | DADGPLYLPY | KTIVSTVSGM | VFNEGEAQL  | IEILSEKAGI | IQDTWHKATQ | KGDPVALIKR |
| 710        | 720         | 730        | 740        | 750        | 760        | 770        | 780        | 790        | 800        |
| QLEEKEKLLA | TEQEDAAVAK  | SKLRELNKEM | AAEKAKAAAG | EAKVKKQLVA | REQEITAVQA | RMQASYREHV | KEVQQLQGI  | RTLQEQLENG | PNTQLARLQQ |
| 810        | 820         | 830        | 840        | 850        | 860        | 870        | 880        | 890        | 900        |
| ENSILRDALN | QATSQVESKQ  | NAELAKLRQE | LSKVSKEKLV | KSEAVRQDEQ | QRKALEAKAA | AFEKQVLQLQ | ASHRESEAL  | QKRLDEVSR  | LCHTQSSHAS |
| 910        | 920         | 930        | 940        | 950        | 960        | 970        | 980        | 990        | 1000       |
| LRADAEKAQE | QQQQMAELHS  | KLQSSEAEVR | SKCEELSGH  | GQLQEARAEN | SQLTERIRSI | EALLEAGQAR | DAQDVQASQA | EADQQQTRLK | ELESQVSGLE |
| 1010       | 1020        | 1030       | 1040       | 1050       | 1060       | 1070       | 1080       | 1090       | 1100       |
| KEATELREAV | EQQKVKNNDL  | REKNWKAMEA | LATAEQACKE | KLKSLTQAKE | ESEKQLCLIE | AQTMEALLAL | LPELSVLAQQ | NYTEWLQDLK | EKGPTLLKHP |
| 1110       | 1120        | 1130       | 1140       | 1150       | 1160       | 1170       | 1180       | 1190       | 1200       |
| PAPAEPSDL  | ASKLREAEET  | QSTLQAECDQ | YRSILAETEG | MLRDLQKSVE | EEEQVWRAKV | GAAEEELQKS | RVTVKHLEEI | VEKLKGELES | SDQVREHTSH |
| 1210       | 1220        | 1230       | 1240       | 1250       | 1260       | 1270       | 1280       | 1290       | 1300       |
| LEAELEKMA  | AASAECONYA  | KEVAGLRQLL | LESQSQLDAA | KSEAQKQSDE | LALVRQQLSE | MKSHVEDGDI | AGAPASSPEA | PPAEQDPVQL | KTQLEWTEAI |

## Protein Report

LC-MALDI\_OtherMammals\_Mascot\_2020-01-15 19:00:42



### MS/MS Peptide Matches

| Cmpd. | m/z meas. | z | $\Delta$ m/z [ppm] | $\Delta$ m/z [Da] | Rt [min] | Score | No. of Cmpds. | Site [%] | P | Sequence       | Modification | Range     | Type |
|-------|-----------|---|--------------------|-------------------|----------|-------|---------------|----------|---|----------------|--------------|-----------|------|
| 180   | 1142.7105 | 1 | 18.65              | 0.0213            | 41.00    | 27.28 | 1             | 0.0      | 1 | R.AATRLQELLK.T |              | 1366-1375 | CID  |
